# Supplementary material
Source: PubMed Central journal article supplement (PMC3723389)
Supplement: NIHMS485983-supplement-01.pdf [file NIHMS485983-supplement-01.pdf]

## SUPPLEMENTARY MATERIALS

Fig. S1. Effects of TGF- $\beta$  antibody on the expression of *miR-192*, other microRNAs and fibrotic factors in MCs treated with high glucose.

Fig. S2. Western blots of Ets-1 and pEts-1 in MMCs treated with TGF- $\beta$ .

Fig. S3. Sustained acetylation of Ets-1 up to 72 hours after TGF- $\beta$  treatment, and its inhibition by MK-2206.

Fig. S4. Western blots of pAkt (Ser<sup>473</sup>) in MCs treated with TGF- $\beta$  and transfected with dominant-negative Akt.

Fig. S5. Effects of MK-2206 on the expression of *miR-192* host RNA *CJ24* and collagens in murine MCs treated with TGF- $\beta$ .

Fig. S6. Reporter activity in response to TGF- $\beta$  in MCs derived from Ets-1-deficient mice.

Fig. S7. Decreased enrichment of acetyl Ets-1 compared to Ets-1 in the upstream region of *miR-192*.

Fig. S8. Effects of *miR-192* inhibitor on Ets-1 occupancy at Smad or Ets-1 sites in the upstream of *miR-192* in MCs.

## Supplementary Materials

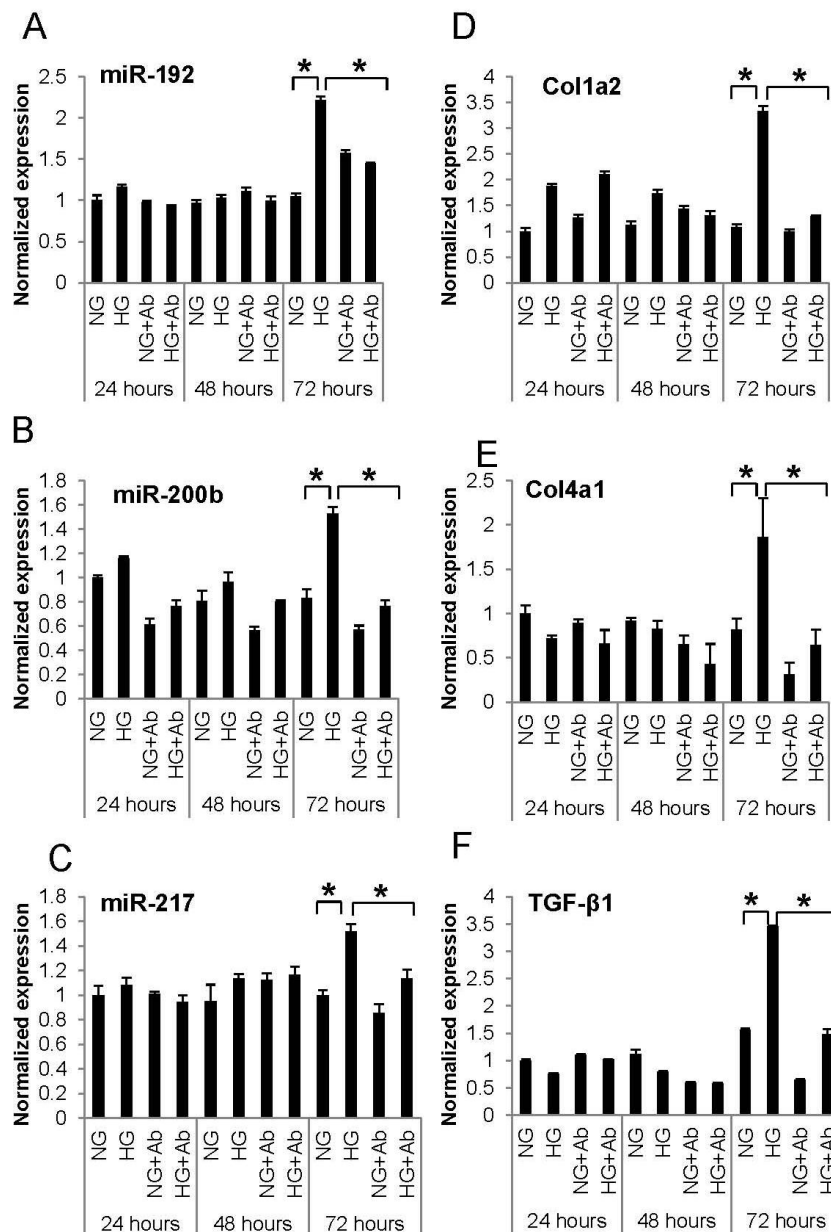

**Figure S1. Effects of TGF-β antibody on the expression of *miR-192*, other microRNAs and fibrotic factors in MCs treated with high glucose.** (A to F) RT-PCR analysis of the expression of *miR-192* (A), *miR-200b* (B), *miR-217* (C), *Col1a2* (D), *Col4a1* (E), and *TGF-β 1* (F) in MCs treated with normal glucose (NG, 5.5 mM) or high glucose (HG, 25mM), with or without antibody against TGF-β (Ab, 1 μg/ml). Data are means ± SEM from three experiments. \**P* < 0.05 by one-way ANOVA followed by Tukey's post-hoc test analysis.

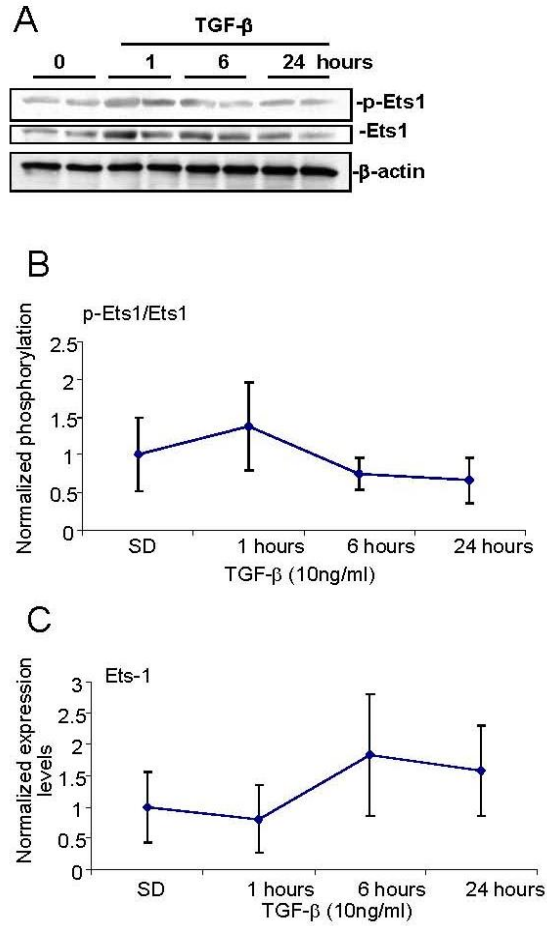

**Figure S2. Western blots of Ets-1 and pEts-1 in murine MCs treated with TGF- $\beta$ .** (A) Representative Western blots and (B) quantification of p-Ets-1/Ets-1 ratio and total Ets-1 (C) in murine MCs treated with TGF- $\beta$  normalized against serum depleted (SD) cells. Blots are representative and data are means  $\pm$  SEM from four experiments. No significant changes were detected.

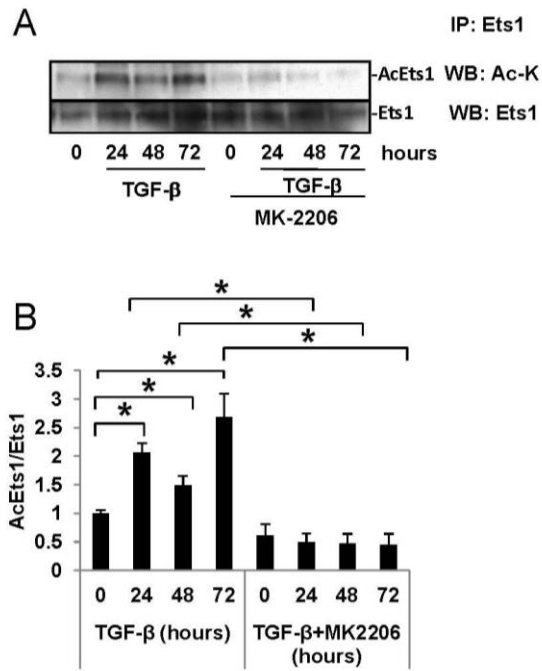

**Figure S3. Sustained acetylation of Ets-1 up to 72 hours after TGF- $\beta$  treatment, and its inhibition by MK-2206.** (A) MCs were treated with TGF- $\beta$  and Akt inhibitor MK-2206 for up to 72 hours. Lysates were immunoprecipitated (IP) with an antibody against Ets-1 and analyzed by Western blotting for acetylated Ets-1 (Ac-Ets-1) with an antibody against acetyl lysine (Ac-K). (B) Normalized ratio of Ac-Ets-1 to total Ets-1. Data are means  $\pm$  SEM from three experiments. \* $P$  < 0.05 by one-way ANOVA followed by Tukey's post-hoc test analysis.

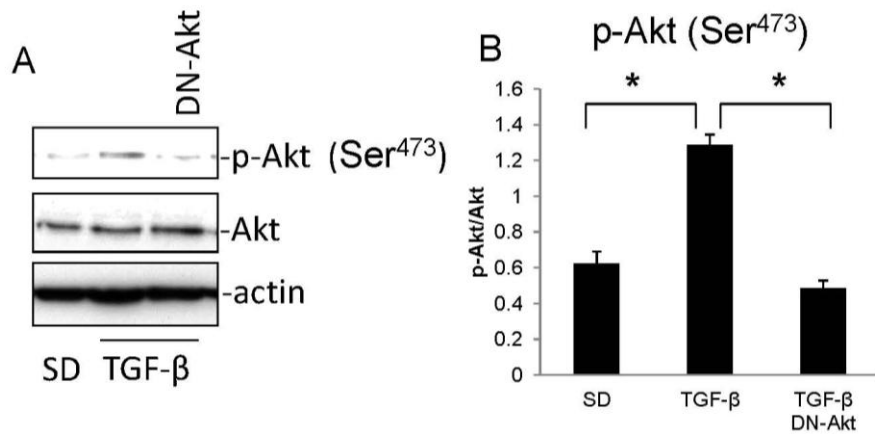

**Figure S4. Western blots of pAkt (Ser<sup>473</sup>) in MCs treated with TGF- $\beta$  and transfected with dominant-negative Akt.** (A) Representative Western blots of lysates from MCs treated with TGF- $\beta$  for 24 hours and transfected with dominant-negative Akt (DN-Akt)(from Dr. Hu, M.D. Anderson Cancer Center, Houston, Texas) . (B) Quantification of p-Akt/Akt ratio from (A). SD, serum depleted. Data are means  $\pm$  SEM from four experiments. \* $P < 0.05$  by one-way ANOVA followed by Tukey's post-hoc test analysis.

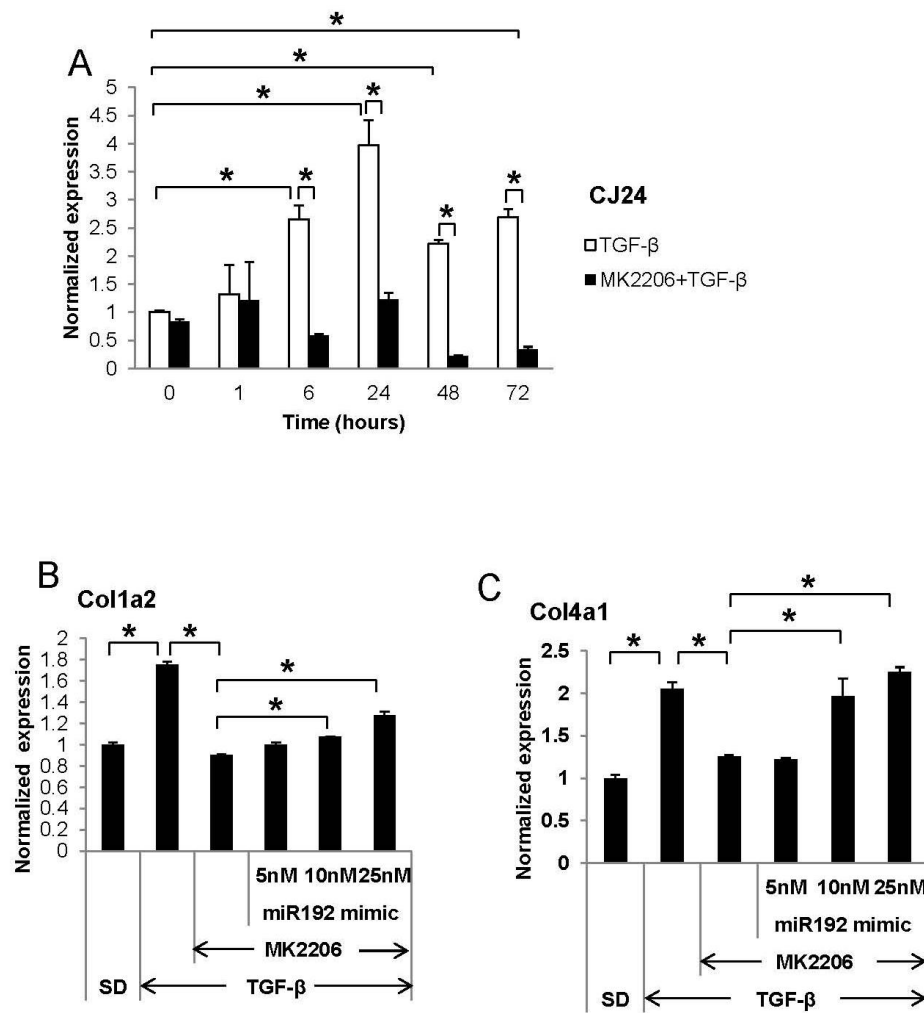

**Figure S5. Effects of MK-2206 on the expression of *miR-192* host RNA *CJ24* and collagens in murine MCs treated with TGF- $\beta$ .** (A) RT-PCR analysis of the expression of *miR-192* host RNA *CJ24* in cells treated with MK-2206 (1  $\mu$ M) 1 hour before TGF- $\beta$  treatment (for 24 hours). Data are means  $\pm$  SEM from three experiments. (B and C) Effects of MK-2206 (1  $\mu$ M) and miR-192 mimic on the expression of *Col1a2* (B) and *Col4a1* (C) in MCs treated with TGF- $\beta$  (10 ng/ml). SD, serum depletion. Data are means  $\pm$  SEM from three experiments. \* $P$  < 0.05 by one-way ANOVA followed by Tukey's post-hoc test analysis.

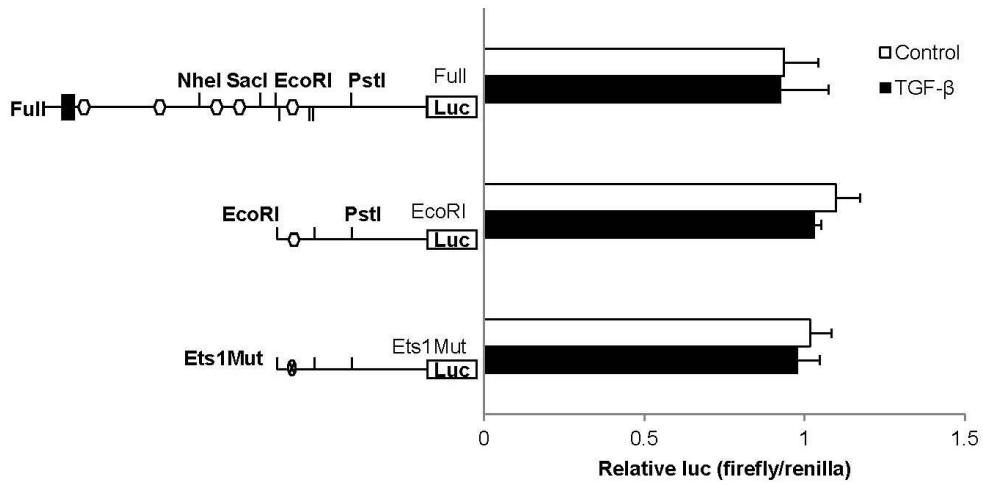

**Figure S6. Reporter activity in response to TGF- $\beta$  in MCs derived from Ets-1-deficient mice. (A)**

Activity of the luciferase (Luc) reporter linked to either full-length or various restriction enzyme-generated fragments of the *CJ24* upstream region was assessed in response to TGF- $\beta$  (10 ng/ml, 24 hours) in MCs derived from Ets-1-deficient mice. Data are means  $\pm$  SEM from three experiments. No significant changes were detected.

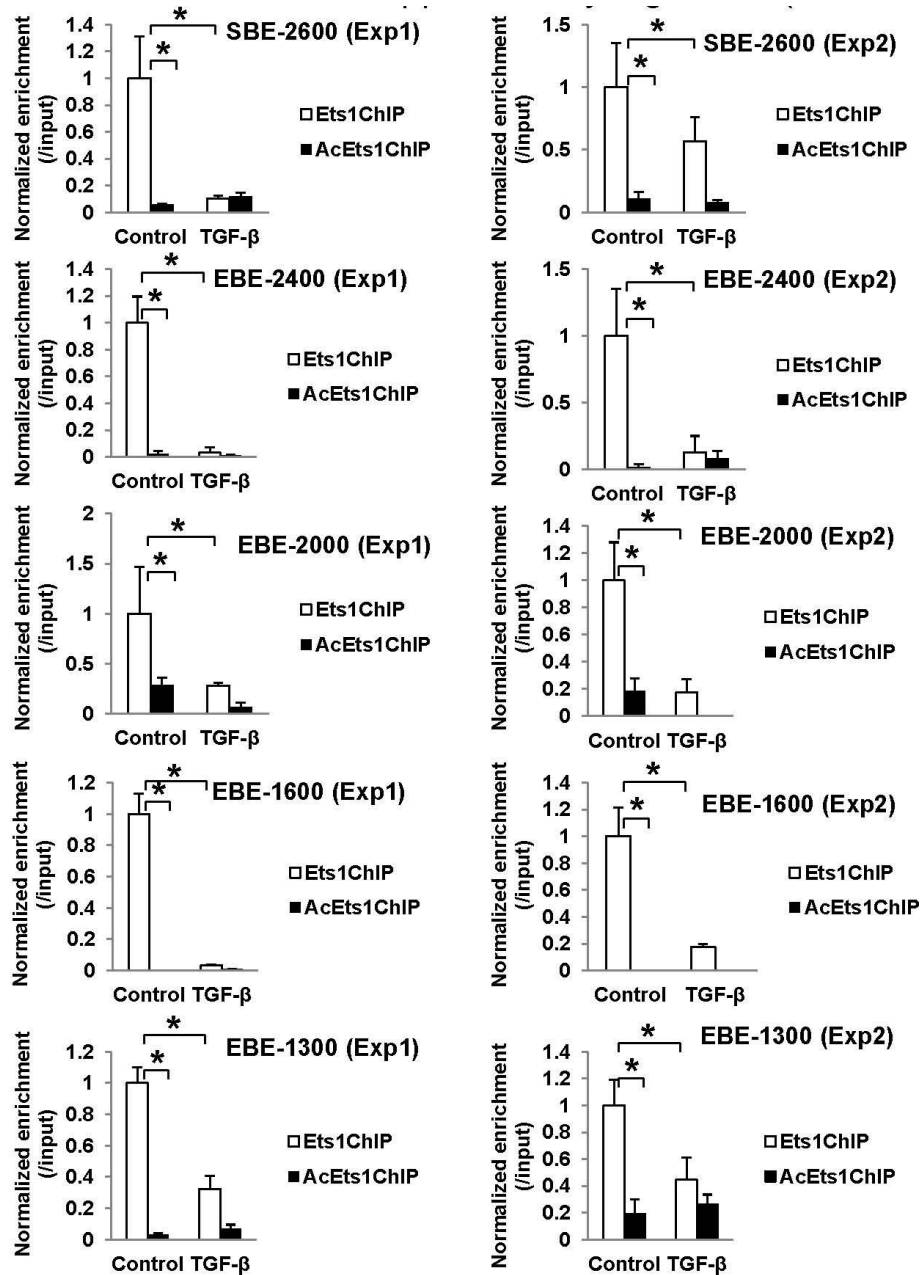

**Figure S7. Decreased enrichment of acetyl Ets-1 compared to Ets-1 in the upstream region of miR-192.** ChIP analysis of the acetylation of Smad (SBE-2600) and Ets-1 (EBE-2400, EBE-2000, EBE-1600 and EBE-1300) sites in MCs treated with TGF- $\beta$ . Ets-1 ChIPed and Acetyl lysine re-ChIPed DNA were analyzed by qPCR and normalized against the untreated control. Data for two independent experiments are shown (Exp1 and Exp2) and are means  $\pm$  SD from three independent PCRs. \* $P$  < 0.05 by one-way ANOVA followed by Tukey's post-hoc test analysis. TGF- $\beta$  (10 ng/ml, 24 hours).



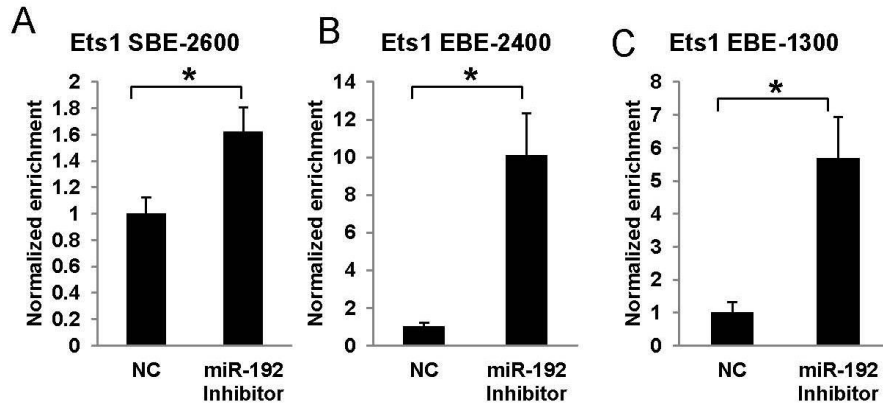

**Figure S8. Effects of *miR-192* inhibitor on Ets-1 occupancy at Smad or Ets-1 sites in the upstream of *miR-192* in MCs.** ChIP analysis of Ets-1 occupancy at Smad (SBE-2600) or Ets-1 (EBE-2400 and EBE-1300) sites in the upstream region of *miR-192* in MCs treated with 10 nM *miR-192* inhibitor. NC, negative control. Data are means  $\pm$  SEM from three experiments. \* $P < 0.05$  by Student's t-tests. .
